# Supplementary material for: Validation of density functional methods for computing structures and energies of mercury(iv) complexesElectronic supplementary information (ESI) available: Structure of transition state for HgH4 dissociation and tables with CP-connections and transition state structures. See http://www.rsc.org/suppdata/cp/b3/b315019d/
Source: Royal Society of Chemistry journal article supplement (doi:10.1039/b315019d), 2004-01-01
Supplement: tables.pdf [file tables.pdf]

**Electronic Supplementary Information for PCCP**

**This journal is © the Owner Societies 2004.**

Table S1: Calculated CP-corrections (kJ mol<sup>-1</sup>) at post-HF levels

|                   | <b>Hg</b>  |             |                | <b>X</b>    |                |
|-------------------|------------|-------------|----------------|-------------|----------------|
|                   | <b>MP2</b> | <b>CCSD</b> | <b>CCSD(T)</b> | <b>CCSD</b> | <b>CCSD(T)</b> |
| HgF <sub>4</sub>  | 26.0       | 23.0        | 24.8           | 3.8         | - <sup>a</sup> |
| HgCl <sub>4</sub> | 20.5       | 18.0        | 19.4           | 3.2         | - <sup>a</sup> |
| HgH <sub>4</sub>  | 29.9       | 26.5        | 28.6           | 0.0         | 0.0            |
| HgF <sub>2</sub>  | 12.9       | 11.3        | 12.2           | 1.5         | 1.5            |
| HgCl <sub>2</sub> | 10.4       | 9.1         | 9.8            | 1.1         | 1.2            |
| HgH <sub>2</sub>  | 15.0       | 13.3        | 14.3           | 0.0         | 0.0            |
| F <sub>2</sub>    |            |             |                | 1.2         | 1.3            |
| Cl <sub>2</sub>   |            |             |                | 0.9         | 1.0            |
| H <sub>2</sub>    |            |             |                | 0.0         | 0.0            |

<sup>a</sup>CP correction was not possible, due to system size.

Table. S2: Structure of the transition state for H<sub>2</sub> elimination from HgH<sub>4</sub> calculated at different levels<sup>a</sup>

|                       | <b>Geometry</b> | <b>SVWN5</b> | <b>BP86</b> | <b>B1LYP</b> | <b>B3LYP</b> | <b>MPW1PW91</b> | <b>BHandHLYP</b> |
|-----------------------|-----------------|--------------|-------------|--------------|--------------|-----------------|------------------|
| this work,<br>basis B | rHg-H1          | 1.699        | 1.709       | 1.693        | 1.696        | 1.683           | 1.672            |
|                       | rHg-H2          | 1.674        | 1.687       | 1.684        | 1.684        | 1.675           | 1.674            |
|                       | rH1-H1          | 1.324        | 1.353       | 1.394        | 1.386        | 1.382           | 1.422            |
|                       | ∠ H2-Hg-H2      | 104.1        | 102.8       | 101.7        | 101.9        | 101.7           | 101.2            |
|                       | ∠ H2-Hg-H1      | 105.0        | 105.3       | 104.8        | 105.0        | 104.9           | 104.3            |
| ref. 8                | Hg-H1           |              |             |              | 1.692        |                 |                  |
|                       | Hg-H2           |              |             |              | 1.668        |                 |                  |
|                       | H1-H1           |              |             |              | 1.329        |                 |                  |
|                       | ∠ H2-Hg-H2      |              |             |              | 103.6        |                 |                  |
|                       | ∠ H2-Hg-H1      |              |             |              | 105.1        |                 |                  |

<sup>a</sup>Bond lengths in Å, bond angles in deg. See Figure S1 for atom labels.
