# Supplementary figures and images for: Validation of density functional methods for computing structures and energies of mercury(iv) complexesElectronic supplementary information (ESI) available: Structure of transition state for HgH4 dissociation and tables with CP-connections and transition state structures. See http://www.rsc.org/suppdata/cp/b3/b315019d/
Source: Royal Society of Chemistry journal article supplement (doi:10.1039/b315019d), 2004-01-01

Fig. S1: The structure of transition state for  $\text{HgH}_4$  dissociation.

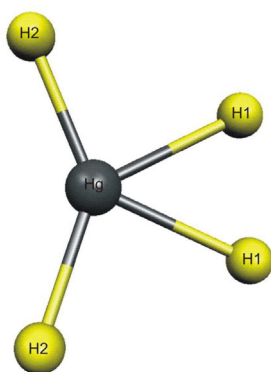

Supplement: figs1.pdf [file figs1.pdf]
